# Supplementary material for: Fatigue in children and adolescents perinatally infected with human immunodeficiency virus: an observational study
Source: BMC Pediatr. 2021 Nov 20;21:519. doi: 10.1186/s12887-021-02977-6 (PMC8605599; doi:10.1186/s12887-021-02977-6)
Supplement: Supplementary file 2 — Additional file 2. [file 12887_2021_2977_MOESM2_ESM.xlsx]

## Sheet: Fatigue_sharing
HIV_status	Age_Range	pfatigue_total	pfatigue_generalfatigue	pfatigue_sleep	pfatigue_cognitive	p_physical	p_emotional	p_social	p_school	p_total
0	13 to 18	75	87.5	45.8333	91.6667	90.625	90	100	90	92.3913
0	13 to 18	72.2222	70.8333	62.5	83.3333	84.375	75	100	70	82.6087
0	8 to 12	68.0556	62.5	66.6667	75	96.875	65	55	75	76.087
0	8 to 12	69.4444	70.8333	83.3333	54.1667	96.875	45	50	50	65.2174
0	8 to 12	80.5556	83.3333	100	58.3333	90.625	45	75	80	75
0	8 to 12	100	100	100	100	93.75	90	100	95	94.5652
0	8 to 12	100	100	100	100	96.875	90	100	90	94.5652
0	8 to 12	100	100	100	100	100	100	100	100	100
0	8 to 12	66.6667	79.1667	50	70.8333	100	70	95	65	84.7826
0	8 to 12	80.5556	87.5	83.3333	70.8333	90.625	70	90	85	84.7826
0	8 to 12	70.8333	83.3333	70.8333	58.3333	96.875	60	75	65	77.1739
0	8 to 12	90.2778	95.8333	95.8333	79.1667	93.75	75	90	95	89.1304
0	8 to 12	83.3333	83.3333	91.6667	75	81.25	75	95	65	79.3478
0	8 to 12	98.6111	100	95.8333	100	81.25	70	85	100	83.6957
1	8 to 12	94.4444	91.6667	95.8333	95.8333	93.75	80	100	85	90.2174
1	8 to 12	70.8333	91.6667	79.1667	41.6667	100	70	90	90	89.1304
1	13 to 18	79.1667	87.5	58.3333	91.6667	90.625	85	100	75	88.0435
1	8 to 12	77.7778	75	95.8333	62.5	90.625	65	80	65	77.1739
1	8 to 12	79.1667	87.5	66.6667	83.3333	96.875	80	80	80	85.8696
1	8 to 12	73.6111	83.3333	83.3333	54.1667	84.375	85	95	75	84.7826
1	8 to 12	68.0556	79.1667	83.3333	41.6667	90.625	40	55	55	64.1304
1	8 to 12	54.1667	62.5	45.8333	54.1667	68.75	35	70	60	59.7826
1	8 to 12	76.3889	87.5	58.3333	83.3333	90.625	75	90	65	81.5217
1	8 to 12	98.6111	100	95.8333	100	100	100	100	100	100
1	8 to 12	75	87.5	87.5	50	81.25	60	85	90	79.3478
1	8 to 12	84.7222	87.5	95.8333	70.8333	93.75	80	60	55	75
1	8 to 12	90.2778	91.6667	91.6667	87.5	96.875	65	100	85	88.0435
1	8 to 12	77.7778	87.5	70.8333	75	87.5	65	95	75	81.5217
